# Supplementary material
Source: Springer Nature journal article supplement (https://www.springermedizin.de/resource/supplementary/12889_2013_5484_MOESM5_ESM.PDF/9496710)
Supplement: MOESM5 [file 9496710]

### Additional file 5. Total DALYs averted by all PSI interventions worldwide, 2012, by intervention

| Intervention Products / Services                | 2012 Distribution | Total DALYs Averted* by Intervention in All PSI Countries, 2012 |
|-------------------------------------------------|-------------------|-----------------------------------------------------------------|
| Long-lasting, insecticide-treated net           | 23,477,497        | 5,872,021                                                       |
| Condom                                          | 1,095,906,825     | 4,123,690^                                                      |
| Artemisinin-based combination therapy (malaria) | 15,351,526        | 2,401,212                                                       |
| Free condom                                     | 196,885,149       | 848,278                                                         |
| Antibiotic treatment (pneumonia)                | 3,549,565         | 705,781                                                         |
| Oral contraceptives                             | 47,642,305        | 461,619                                                         |
| Contraceptive injectable (3-month)              | 7,337,034         | 298,153                                                         |
| Male circumcision                               | 185,813           | 228,677                                                         |
| Safe water solution ( <i>Waterguard</i> )       | 15,080,483        | 196,637                                                         |
| IUD insertion (10-year)                         | 315,168           | 184,821                                                         |
| Basic Care Package for HIV                      | 11,762,090        | 166,932                                                         |
| HIV counseling and testing                      | 1,735,376         | 160,510                                                         |
| Malaria rapid diagnostic tests                  | 2,258,255         | 138,730                                                         |
| IUD distribution (5-year)                       | 328,210           | 124,381                                                         |
| ORS and zinc treatment (diarrhea)               | 2,449,776         | 102,401                                                         |
| Contraceptive implant insertion (5-year)        | 159,157           | 84,917                                                          |
| IUD distribution (5-year)                       | 139,323           | 80,407                                                          |
| TB DOTS                                         | 19,921            | 64,972                                                          |
| IUD insertion (5-year)                          | 125,034           | 56,604                                                          |
| Contraceptive injectable (2-month)              | 1,732,173         | 53,931                                                          |
| Medication abortion                             | 434,627           | 49,721                                                          |
| Female condoms                                  | 8,018,070         | 43,494                                                          |
| SDM (Cycle Beads)                               | 124,982           | 41,334                                                          |
| Oral rehydration solution (ORS for diarrhea)    | 2,547,666         | 37,350                                                          |
| STI Kit                                         | 481,679           | 22,653                                                          |
| Water treatment tablets ( <i>Aquatab</i> )      | 69,663,648        | 22,059                                                          |
| Emergency contraception                         | 2,943,169         | 17,508                                                          |
| Zinc (diarrhea)                                 | 2,177,983         | 16,012                                                          |
| Contraceptive referral (implant and IUD)**      | 78,174            | 15,215                                                          |
| Retreatment of ITNs with <i>IconMaxx</i>        | 700,065           | 10,323                                                          |
| Implant insertion (3-month)                     | 27,281            | 9,905                                                           |
| <i>Sprinkles</i> (micronutrient powder)         | 348,285           | 9,717                                                           |
| Misoprostol for postpartum hemorrhage           | 343,762           | 9,060                                                           |
| Voluntary surgical contraception                | 7,099             | 8,638                                                           |
| Contraceptive implant distribution (4-year)     | 15,639            | 8,236                                                           |
| Clean needle and syringe                        | 1,800,950         | 6,928                                                           |
| Chloroquine (malaria in Haiti)                  | 181,700           | 6,714                                                           |
| Contraceptive implant distribution (5-year)     | 22,434            | 6,180                                                           |
| Behavior change (HIV)^                          | n/a               | 6,082                                                           |
| Water purification with <i>PUR</i>              | 44,346,677        | 5,954                                                           |
| Naloxone (opiate overdose)                      | 7,019             | 5,902                                                           |
| Free female condom                              | 937,466           | 5,389                                                           |
| Contraceptive implant distribution (3-year)     | 7,474             | 4,953                                                           |

| Intervention Products / Services        | 2012 Distribution | Total DALYs Averted* by Intervention in All PSI Countries, 2012 |
|-----------------------------------------|-------------------|-----------------------------------------------------------------|
| Retreatment of ITNs with KO123          | 63,104            | 3,898                                                           |
| Contraceptive injectable (1-month)      | 274,227           | 3,244                                                           |
| Iron folic acid tablet                  | 1,946,610         | 1,060                                                           |
| Clean delivery kit                      | 73,306            | 865                                                             |
| Early infant male circumcision          | 546               | 571                                                             |
| Misoprostol for post-abortion care      | 310,408           | 289                                                             |
| Multivitamins through antenatal clinics | 2,460,270         | 254                                                             |
| Manual vacuum aspiration                | 644               | 144                                                             |
| Antiretroviral treatment                | 52,380            | 131                                                             |
| Retreatment of ITNs (6-month)           | 5,000             | 53                                                              |
| Cervical cancer VIA and cryotherapy     | 8                 | 0.8                                                             |
| <b>Total</b>                            | <b>36,091,496</b> | <b>16,734,511</b>                                               |

\* DALYs are calculated based on the methodology used for the 1990 Global Burden of Disease (i.e., DALY (0.03,0)). It is not calculated based on the new GBD methodology that was released in late 2012.

\*\* DALYs averted listed here include those averted from both HIV and family planning.

^ Distribution data are not available for BCC interventions. Instead, we use data from BCC interventions shown to be effective in effecting behavior change. In 2012, there were eight BCC interventions that demonstrated effectiveness in changing sexual behaviors (i.e., Abstinence, Being faithful, or Condom use with different type of partner) within the study population. We input data from these interventions into the HIV BCC model to estimate the number of DALYs averted by the behavior change activities.
